# Supplementary material
Source: PubMed Central journal article supplement (PMC8182642)
Supplement: NIHMS1704604-supplement-supplementary_file.pdf [file NIHMS1704604-supplement-supplementary_file.pdf]

Supporting Information for

$\beta$ -cyclodextrin-poly ( $\beta$ -amino ester) nanoparticles are a  
generalizable strategy for high loading and sustained release of  
HDAC inhibitors

Sauradip Chaudhuri<sup>1</sup>, Martha J. Fowler<sup>1</sup>, Cassandra Baker<sup>1</sup>, Sylwia A. Stopka<sup>2,3</sup>, Michael S. Regan<sup>2</sup>,  
Lindsey Sablatura<sup>1</sup>, Colton W. Broughton<sup>1</sup>, Brandon E. Knight<sup>1</sup>, Sarah E. Stabenfeldt<sup>4</sup>, Nathalie Y. R.  
Agar<sup>2,3,5</sup>, Rachael W. Sirianni<sup>1,4\*</sup>

<sup>1</sup> Vivian L. Smith Department of Neurosurgery, University of Texas Health Science Center at Houston, Houston TX, USA

<sup>2</sup> Department of Neurosurgery, Brigham and Women's Hospital, Harvard Medical School, Boston, MA.

<sup>3</sup>Department of Radiology, Brigham and Women's Hospital, Harvard Medical School, Boston, MA

<sup>4</sup>School of Biological and Health Systems Engineering, Arizona State University, Tempe AZ, USA

<sup>5</sup> Department of Cancer Biology, Dana-Farber Cancer Institute, Harvard Medical School, Boston MA, USA

**\*Author to whom correspondence should be addressed:**

Dr. Rachael W. Sirianni

Medical School Building MSB 7.134

6431 Fannin Street

Houston, TX 77030

713-500-7492

[Rachael.w.sirianni@uth.tmc.edu](mailto:Rachael.w.sirianni@uth.tmc.edu)

**Table of Contents**

Figure S1.....S3  
Figure S2.....S4  
Figure S3.....S5  
Figure S4.....S6  
Figure S5.....S7  
Figure S6.....S8  
Figure S7.....S9  
Figure S8.....S10  
Figure S9.....S11  
Figure S10.....S12  
Figure S11.....S13  
Figure S12.....S14  
Figure S13.....S15  
Figure S14.....S16  
Figure S15.....S17  
Figure S16.....S18  
Figure S17.....S19  
References.....S19

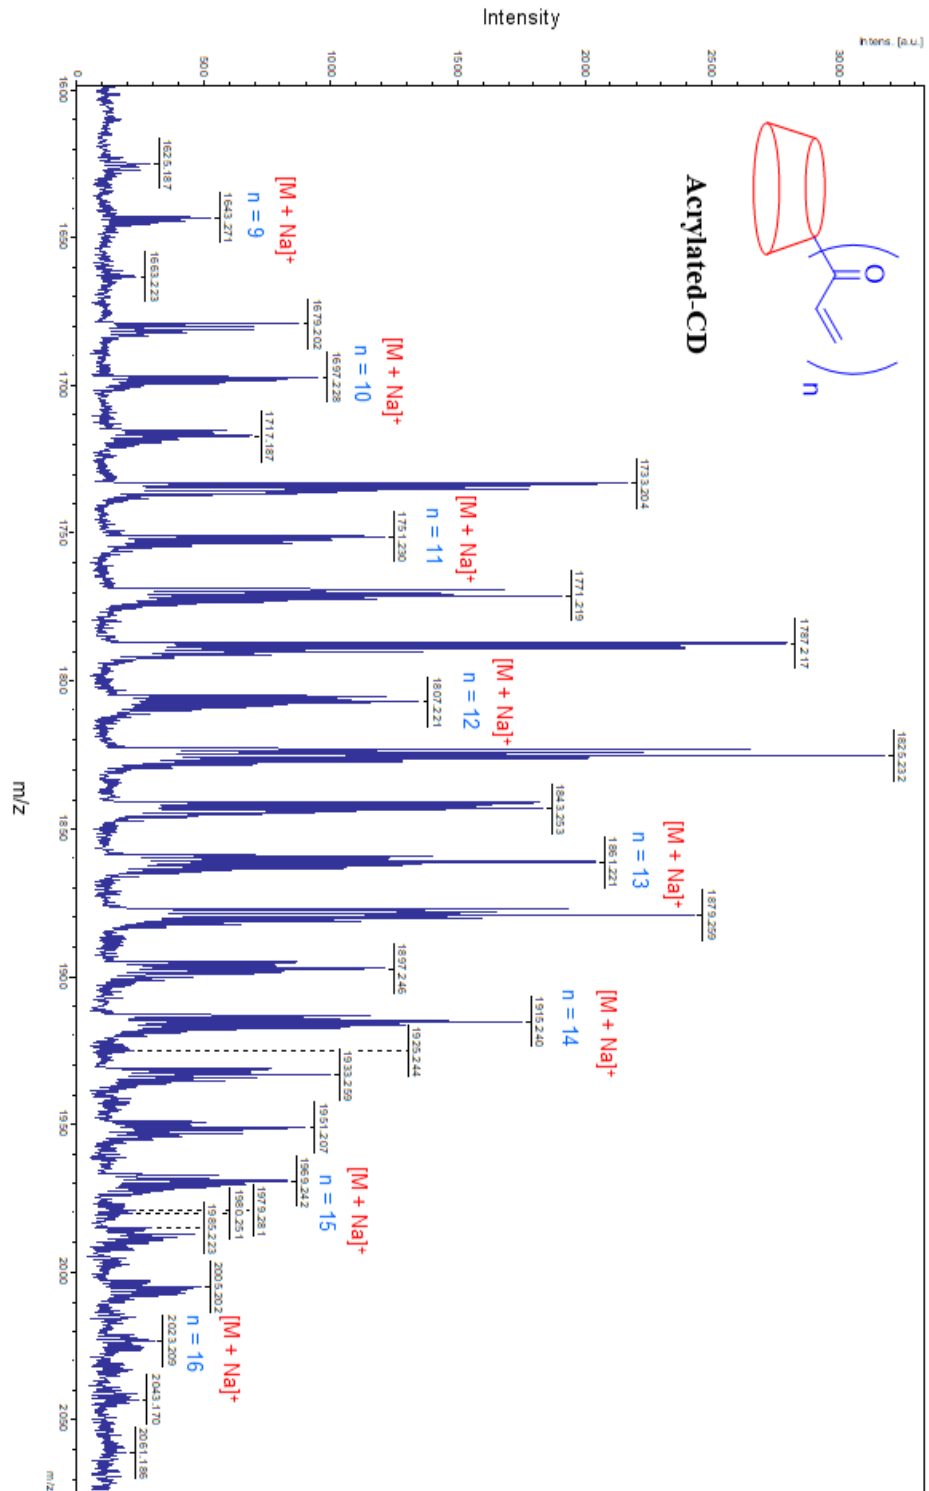

**Figure S1** MALDI-ToF mass spectra of Acrylated-CD recorded in MS Bruker Autoflex MALDI-ToF mass spectrometer. Individual peaks for different degrees (n) of acrylation are identified. Spectra verified against existing reports in the literature [1].

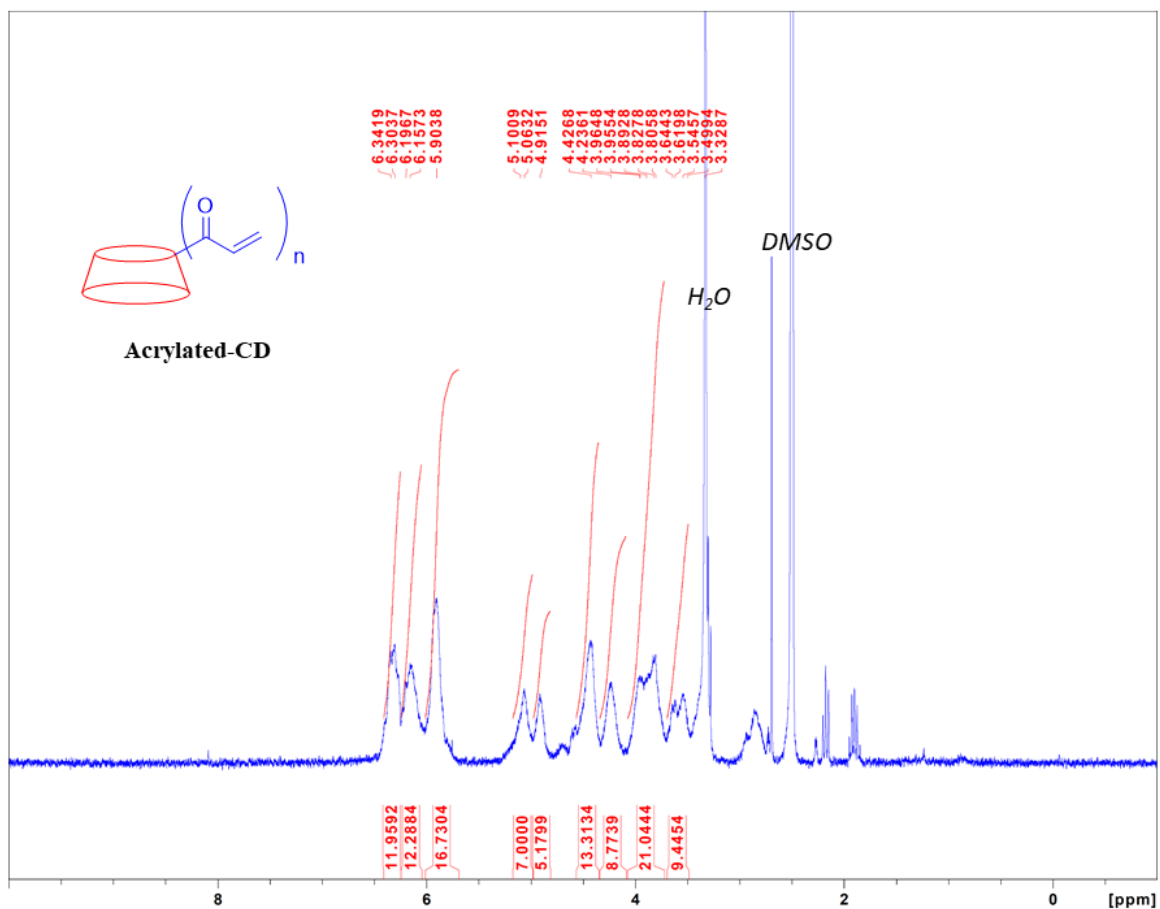

**Figure S2**  $^1\text{H-NMR}$  spectra of Acrylated-CD in  $\text{DMSO-d}_6$  recorded in Bruker Avance 300 MHz NMR spectrometer. The integral labels are noted as an artifact of the software and does not affect the integrated area under the peaks. Spectra verified against existing reports in the literature [1].



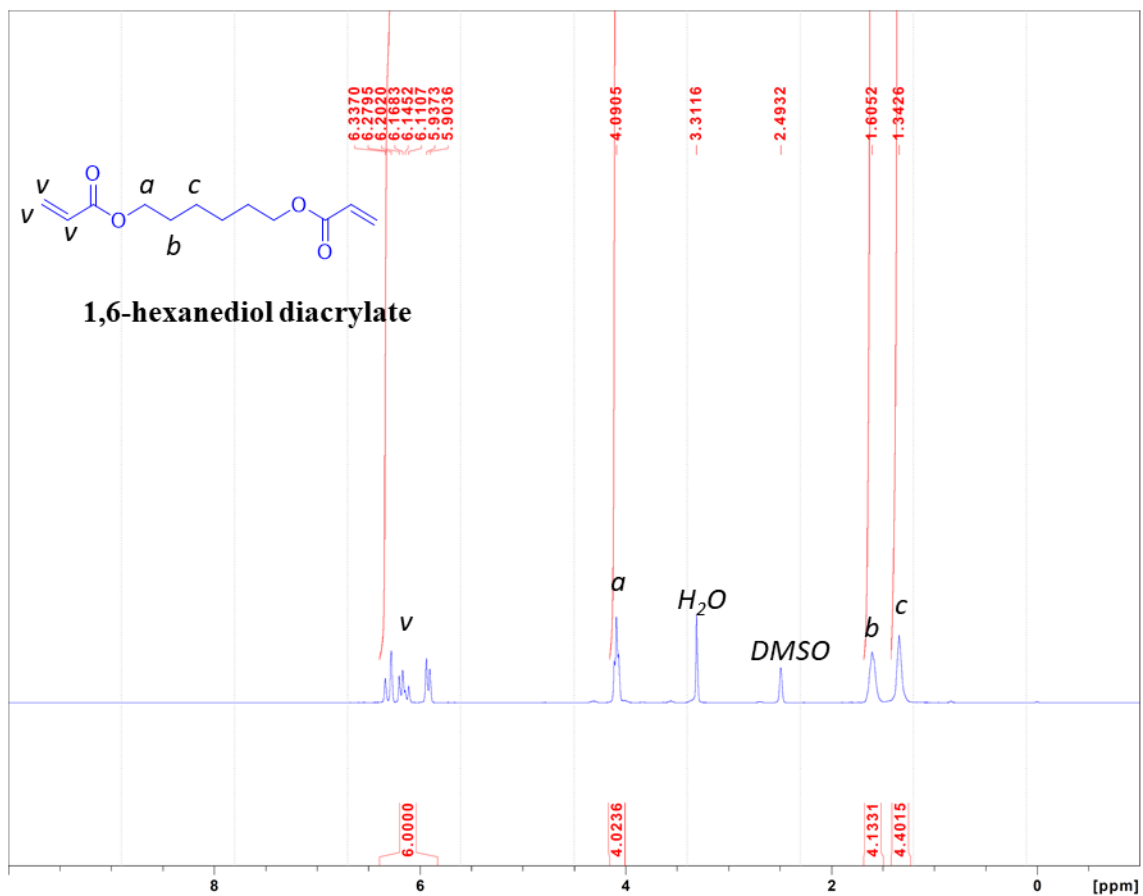

**Figure S4** <sup>1</sup>H-NMR spectra of linker 1,6-hexanediol diacrylate in DMSO-d<sub>6</sub> recorded in Bruker Avance 300 MHz NMR spectrometer. The integral labels are noted as an artifact of the software and does not affect the integrated area under the peaks.

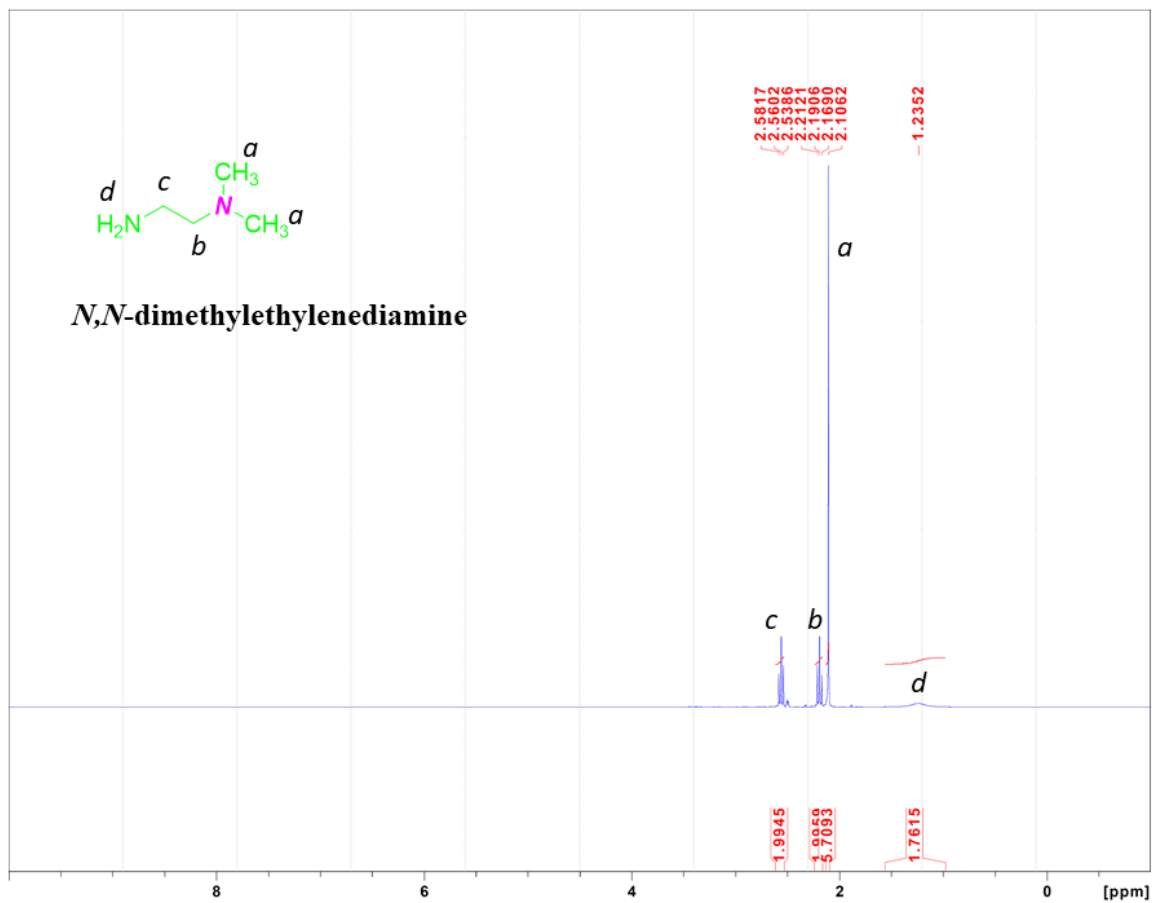

**Figure S5**  $^1\text{H}$ -NMR spectra of *N,N*-dimethylethylenediamine in  $\text{DMSO-d}_6$  recorded in Bruker Avance 300 MHz NMR spectrometer. The integral labels are noted as an artifact of the software and does not affect the integrated area under the peaks.

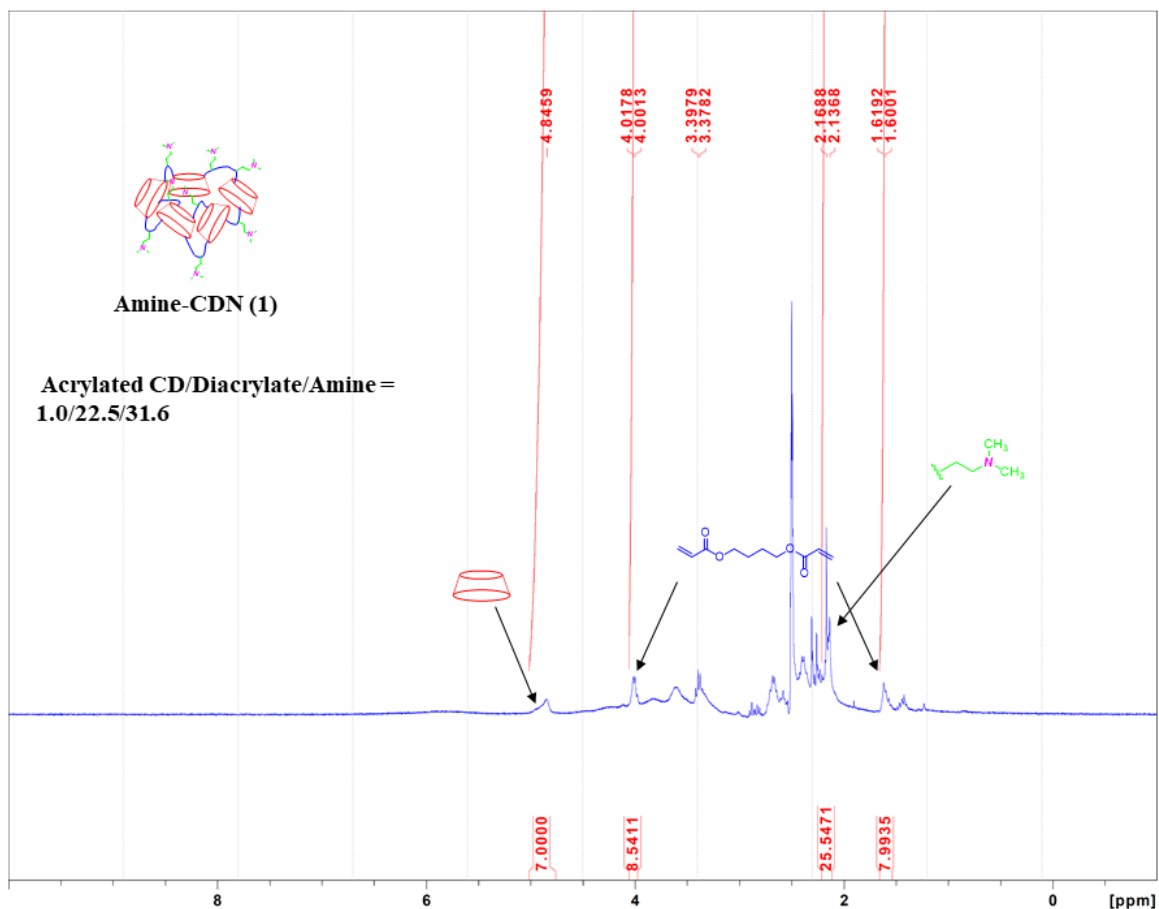

**Figure S6**  $^1\text{H-NMR}$  spectra of CDN-1 in  $\text{DMSO-d}_6$  recorded in Bruker Avance 300 MHz NMR spectrometer. Stoichiometric ratios of constituent units are recorded. Assignments of  $^1\text{H-NMR}$  peaks were attributed to the protons present in the individual molecular entity, which indicates to the composition of the material (CDN-1). The integral labels are noted as an artifact of the software and does not affect the integrated area under the peaks.



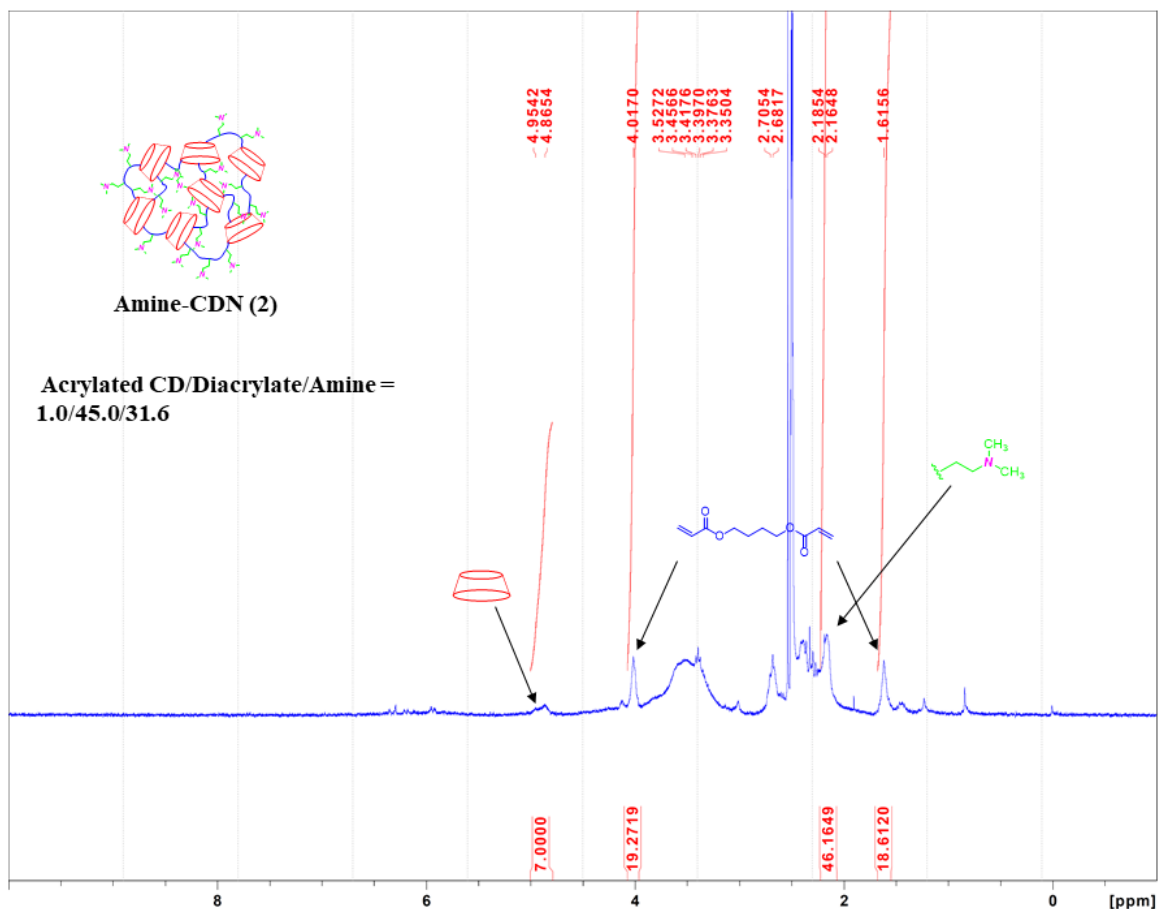

**Figure S7**  $^1\text{H-NMR}$  spectra of CDN-2 in  $\text{DMSO-d}_6$  recorded in Bruker Avance 300 MHz NMR spectrometer. Stoichiometric ratios of constituent units are recorded. Assignments of  $^1\text{H-NMR}$  peaks were attributed to the protons present in the individual molecular entity, which indicates to the composition of the material (CDN-2). The integral labels are noted as an artifact of the software and does not affect the integrated area under the peaks.

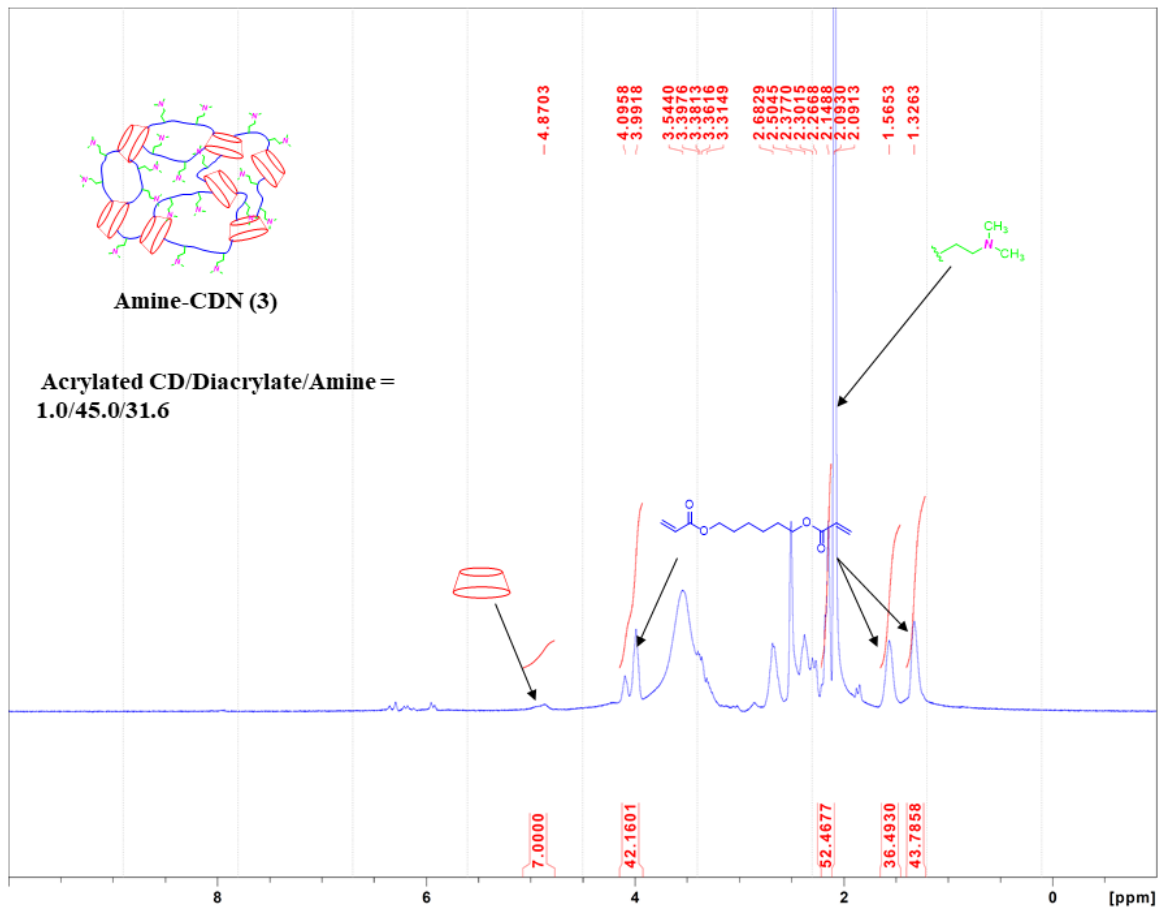

**Figure S8**  $^1\text{H-NMR}$  spectra of CDN-3 in  $\text{DMSO-d}_6$  recorded in Bruker Avance 300 MHz NMR spectrometer. Stoichiometric ratios of constituent units are recorded. Assignments of  $^1\text{H-NMR}$  peaks were attributed to the protons present in the individual molecular entity, which indicates to the composition of the material (CDN-3). The integral labels are noted as an artifact of the software and does not affect the integrated area under the peaks.



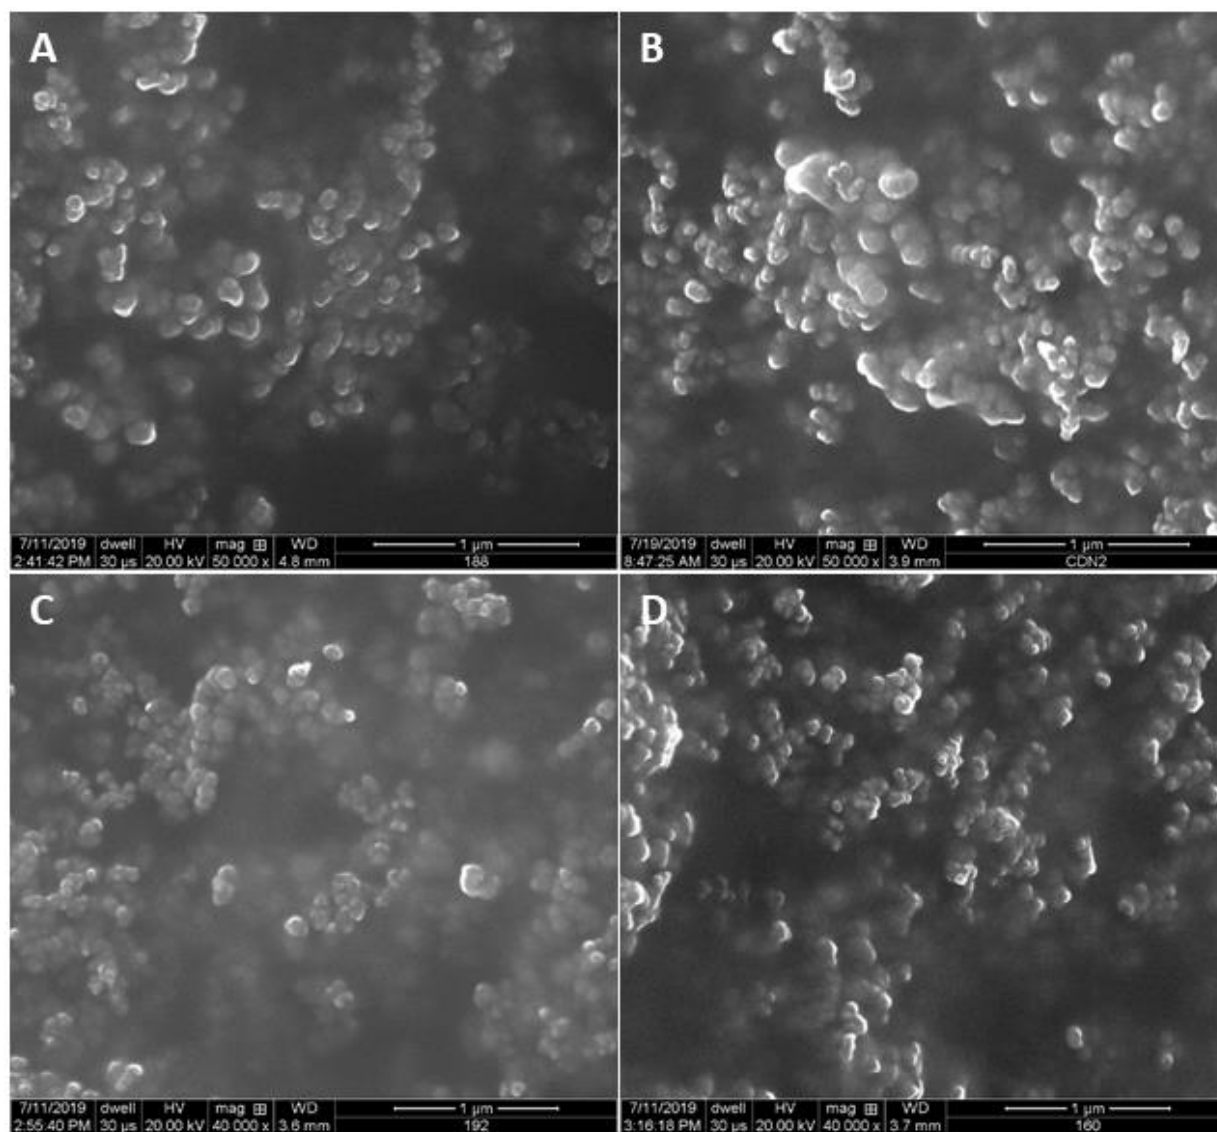

**Figure S10** Scanning electron microscope images of (A) CDN-1; (B) CDN-2; (C) CDN-3 & (D) CDN-4 recorded using FEI Quanta 400 environmental scanning electron microscope. Scale bar = 1 μm.

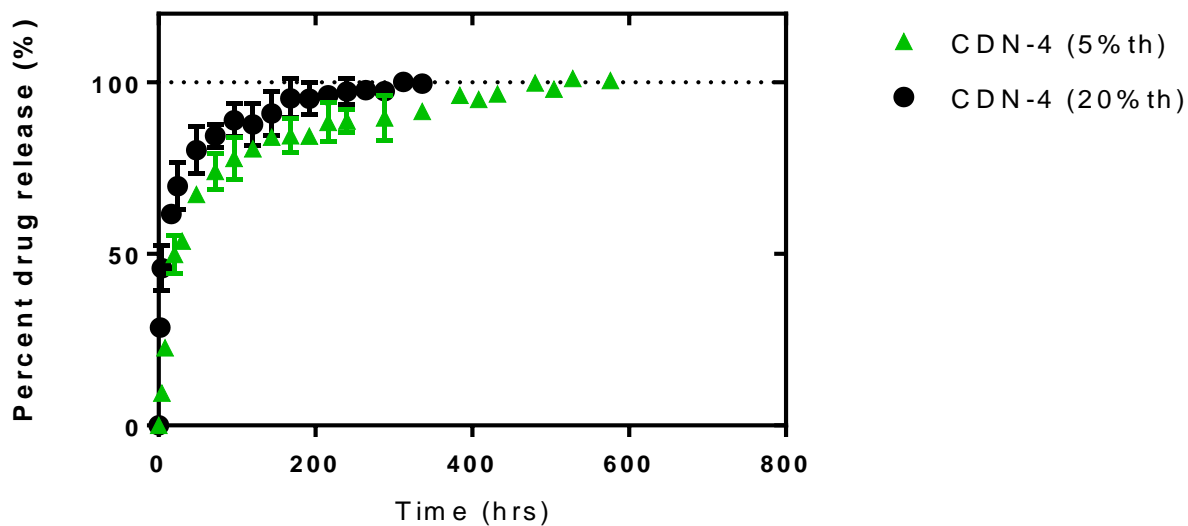

**Figure S11** Controlled release of 5% (w/w) & 20% (w/w) theoretically drug-loaded CDN-4 samples. Error bars are reported as the standard deviation of at least two separate measurements.

## Stability studies Pb-CDN-3 (20%th loaded)

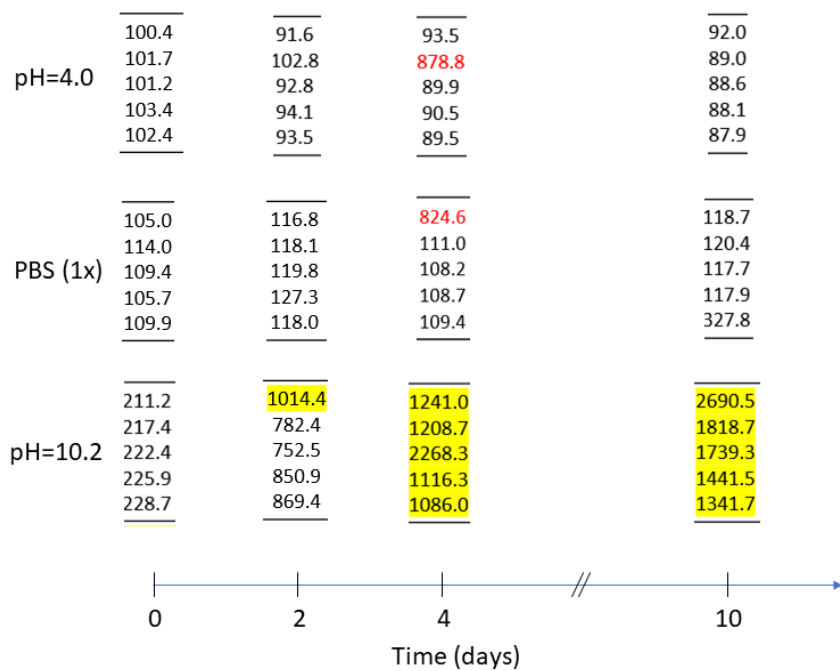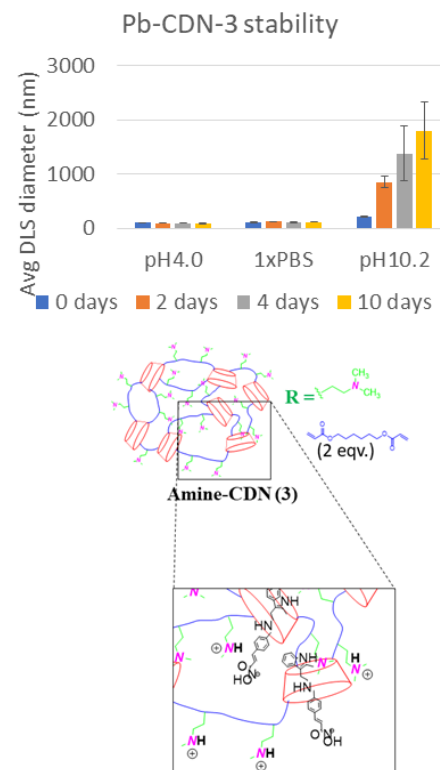

**Figure S12** Stability studies of panobinostat loaded (20% theoretical) CDN-3 nanoparticles in acidic (pH=4.0), PBS (1x, pH=7.4) and basic (pH=10.2) media. Micron aggregates are highlighted in yellow. Measurements in red are statistical outliers.

## Stability studies Pb-CDN-4 (20%th loaded)

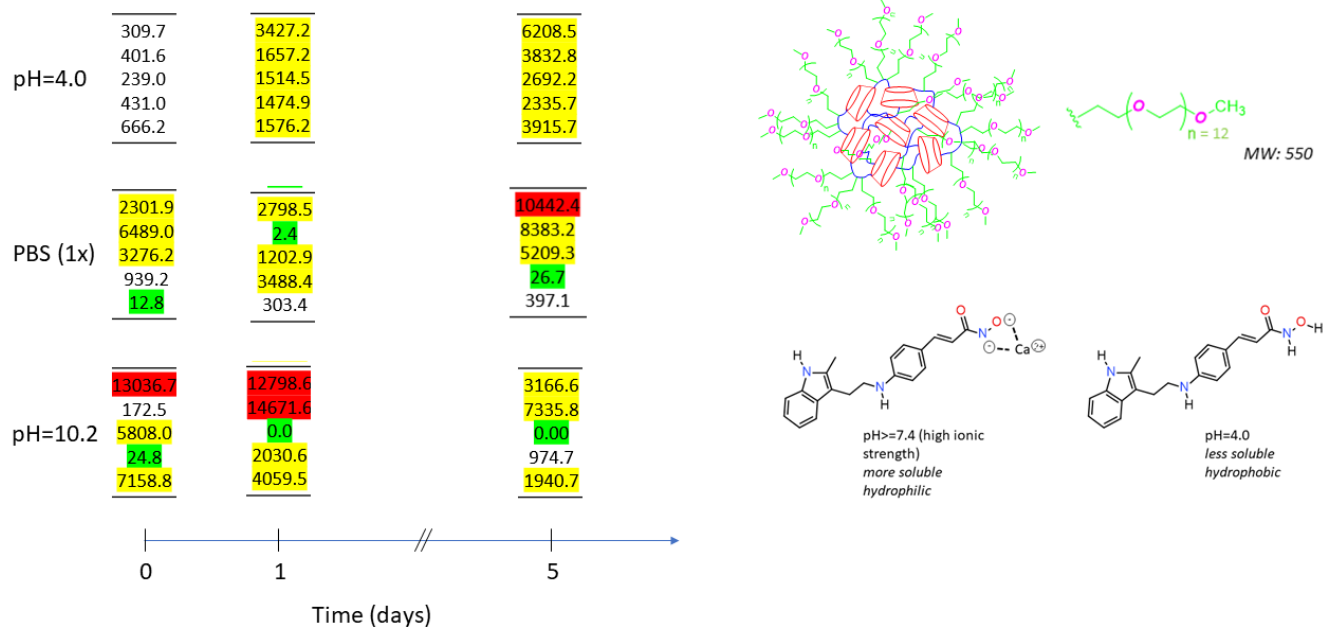

**Figure S13** Stability studies of panobinostat loaded (20% theoretical) CDN-4 nanoparticles in acidic (pH=4.0), PBS (1x, pH=7.4) and basic (pH=10.2) media. Micron aggregates are highlighted in yellow. Smaller populations (<100nm) are highlighted in green, while populations >10 $\mu$ m are highlighted in red.

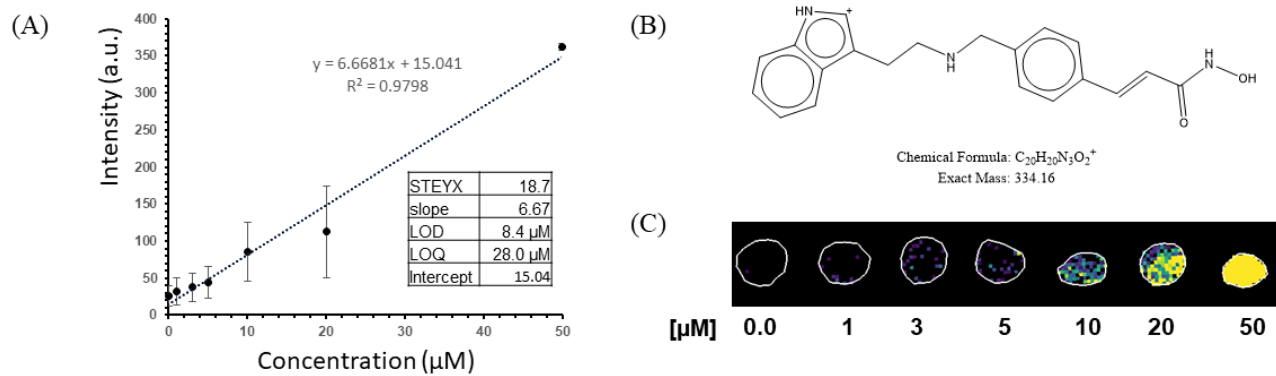

**Figure S14** (A) Calibration curve for MALDI MSI quantitation of panobinostat by monitoring the intensity of the fragment ion at  $m/z$  317.152; (B) The chemical structure of the precursor ion used for the MRM method; (C) ion images from the tissue mimetic model.



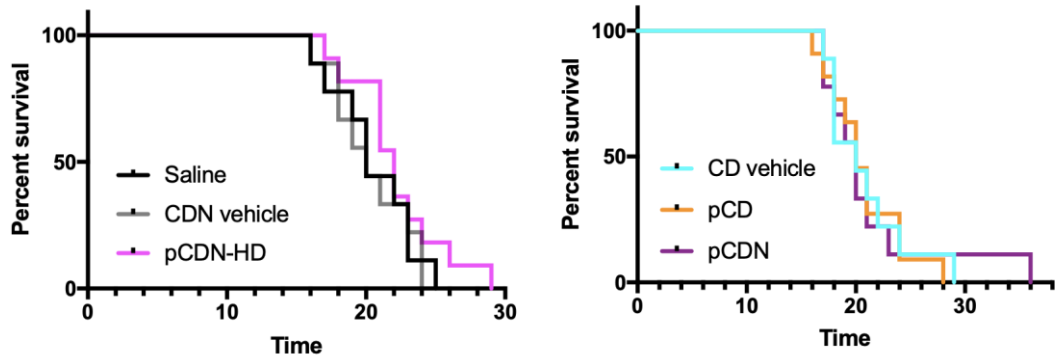

**Figure S15** Kaplan-Meier curve showing survival of mice bearing orthotopic GL261 tumors following CED administration of various treatments.

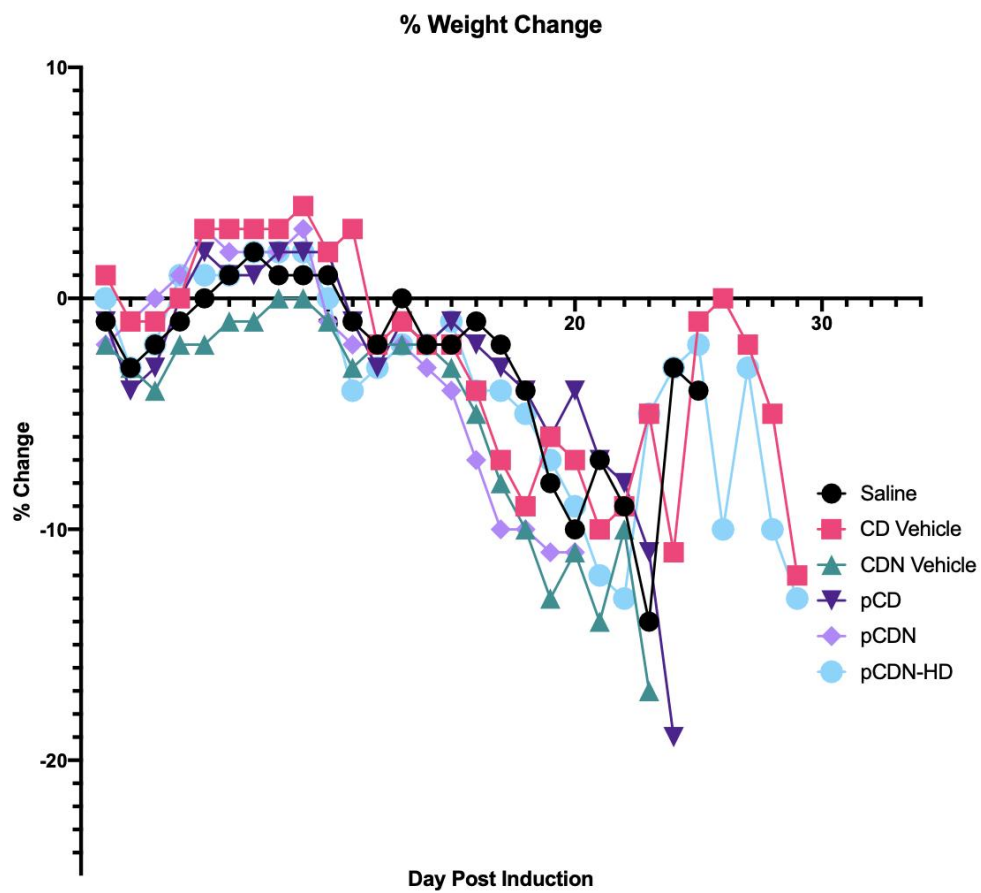

**Figure S16** Plots of post treatment weight changes for mice bearing orthotopic GL261 tumors following CED administration of various treatments.

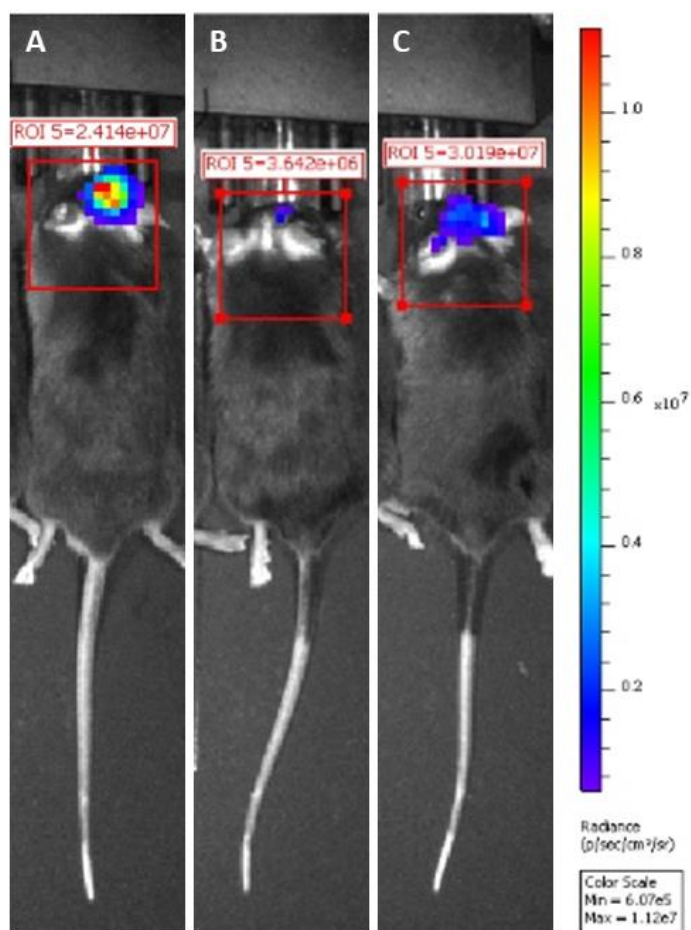

**Figure S17** Tumor IVIS imaging of a representative mouse from pCDN-HD cohort (A) pre-treatment (1 day before); (B) post-treatment (after 4 days); (C) post-treatment (after 8 days).

## References

- [1] Gil, E.S.; Wu, L.; Xu, L.; Lowe, T.L.  $\beta$ -Cyclodextrin-poly ( $\beta$ -Amino Ester) Nanoparticles for Sustained Drug Delivery across the Blood–Brain Barrier. *Biomacromolecules* **2012**, *13*, 3533-3541. <https://doi.org/10.1021/bm3008633>
